# Supplementary material for: Effects of the rotation angle on surface plasmon coupling of nanoprisms
Source: Royal Society of Chemistry journal article supplement (doi:10.1039/c5nr07476b), 2016-01-01
Supplement: c5nr07476b1.pdf [file c5nr07476b1.pdf]

## Supporting Information

### Effects of Rotation-angle on Surface Plasmon Coupling of Nanoprisms

Miao-Hsuan Chien,<sup>†</sup> Li-Wei Nien,<sup>†</sup> Bo-Kai Chao,<sup>†</sup> Jia-Han Li,<sup>‡</sup> and Chun-Hway Hsueh<sup>†,\*</sup>

<sup>†</sup>Department of Materials Science and Engineering, <sup>‡</sup>Department of Engineering Science and Ocean Engineering, National Taiwan University, Taipei 10617, Taiwan

\*Corresponding Author: [hsuehc@ntu.edu.tw](mailto:hsuehc@ntu.edu.tw)

## SCATTERING SPECTROSCOPY

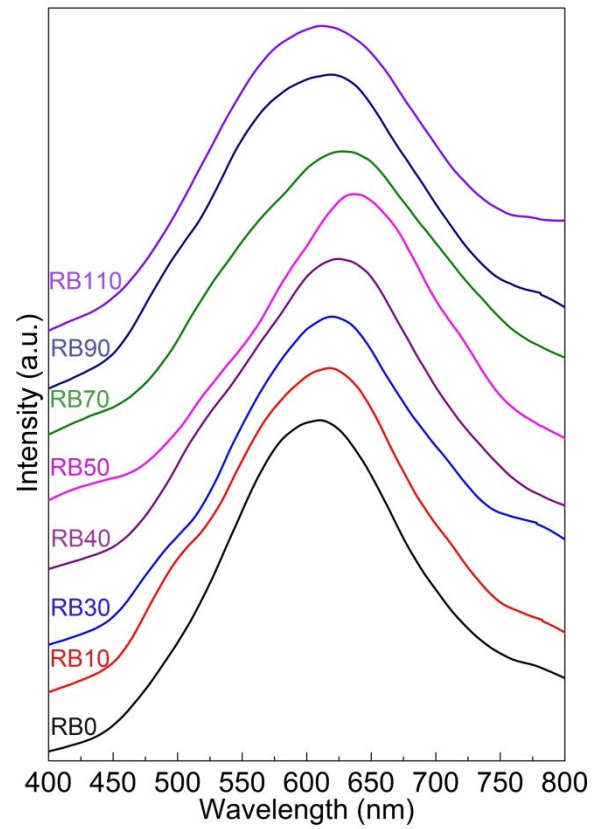

**Figure S1.** Scattering spectra of selected samples of rotated bowtie. The corresponding wavelength of scattering peak as a function of the rotation angle is shown in Figure 4b. Due to the radiation damping effect of  $E$  field and the limitation of the instrumentation, the two modes (tip mode and edge mode) become an unresolvable peak in the scattering spectra.

## RAMAN SPECTRA OF *p*-ATP

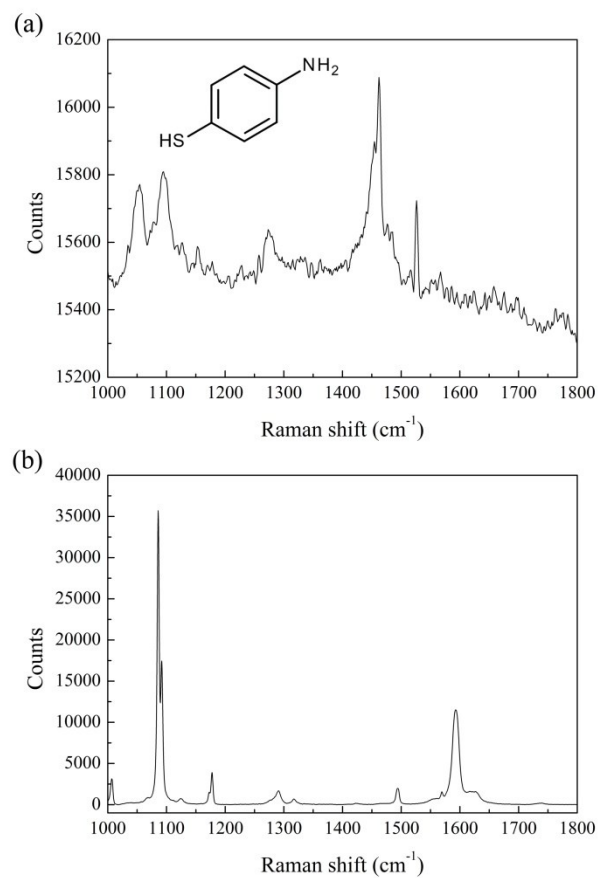

**Figure S2.** The Raman spectra of *p*-ATP with excitation laser of (a) 532 nm and (b) 633 nm. For excitation of 532 nm, the peak around 1460 cm<sup>-1</sup> shows highest response, on the other hand, for excitation of 633 nm, the peak around 1070 cm<sup>-1</sup> is most sensitive to Raman spectroscopy.

**Table S1.** Raman intensity (in counts) of 633-nm-excited samples with Stokes shift of 1070  $\text{cm}^{-1}$ .

| Sample \ No. | 1       | 2       | 3       | 4       | 5       | 6       |
|--------------|---------|---------|---------|---------|---------|---------|
| RB0          | 1326.84 | 1267.15 | 1248.50 | 1229.46 | 1213.14 | 1245.81 |
| RB10         | 1482.36 | 1322.28 | 1334.88 | 1267.99 | 1271.06 | 1212.35 |
| RB20         | 1345.50 | 1396.39 | 1274.73 | 1254.61 | 1257.18 | 1256.69 |
| RB30         | 1398.26 | 1487.64 | 1426.74 | 1313.85 | 1295.77 | 1289.20 |
| RB40         | 1523.28 | 1430.78 | 1531.22 | 1589.55 | 1458.77 | 1411.10 |
| RB50         | 1817.34 | 1893.42 | 1827.55 | 1993.50 | 1801.82 | 1899.66 |
| RB60         | 1311.47 | 1381.52 | 1395.54 | 1395.53 | 1426.09 | 1422.73 |
| RB70         | 2670.16 | 2633.19 | 2526.02 | 2525.88 | 2448.63 | 2889.60 |
| RB80         | 2382.86 | 2279.71 | 2215.98 | 2184.23 | 2334.46 | 2270.28 |
| RB90         | 1709.26 | 1713.23 | 1734.25 | 1754.33 | 1736.44 | 1778.70 |
| RB100        | 1668.34 | 1686.01 | 1660.90 | 1659.63 | 1610.13 | 1628.61 |
| RB110        | 1538.80 | 1531.45 | 1573.59 | 1576.20 | 1525.75 | 1523.43 |
| RB120        | 1376.21 | 1431.45 | 1411.00 | 1417.30 | 1382.32 | 1406.56 |

**Table S2.** Raman intensity (in counts) of 532-nm-excited samples with Stokes shift of 1460  $\text{cm}^{-1}$ .

| Sample \ No. | 1   | 2   | 3   | 4   | 5   | 6   |
|--------------|-----|-----|-----|-----|-----|-----|
| RB0          | 192 | 196 | 192 | 191 | 199 | 196 |
| RB10         | 173 | 171 | 171 | 184 | 175 | 171 |
| RB20         | 158 | 158 | 152 | 152 | 166 | 158 |
| RB30         | 212 | 230 | 215 | 210 | 200 | 200 |
| RB40         | 165 | 158 | 164 | 167 | 161 | 165 |
| RB50         | 172 | 171 | 175 | 171 | 175 | 166 |
| RB60         | 242 | 241 | 229 | 224 | 221 | 222 |
| RB70         | 183 | 181 | 179 | 181 | 189 | 183 |
| RB80         | 173 | 169 | 170 | 174 | 176 | 177 |
| RB90         | 148 | 147 | 150 | 147 | 146 | 154 |
| RB100        | 138 | 140 | 137 | 149 | 140 | 141 |
| RB110        | 126 | 118 | 128 | 136 | 121 | 113 |
| RB120        | 107 | 117 | 110 | 109 | 117 | 135 |

### Size effect of rotated bowtie nanostructures

Size effect is also an important issue in the plasmon coupling of dimers, especially for the highly sensitive bowtie nanostructures. As the size increases, a red-shift in the resonance wavelength would occur. These phenomena could be discussed using the restoring energy. As the size becomes larger, the restoring force of the dipole moment in the nanostructure becomes weaker due to the larger distance between the charges at opposite interfaces of the particles, and thus results in lowering of the resonance frequency and red-shift in the resonance wavelength [1–4]. These phenomena could also be applied to the case of rotated bowties. For example, the spectra of RB70 for the rotated bowties with circumradius of 100 nm (black line) and circumradius of 105 nm (red line) are shown in Fig. S3. Both the tip-mode and edge-mode resonances show a slight red-shift in the resonance wavelength as the circumradius (and hence the size) increases.

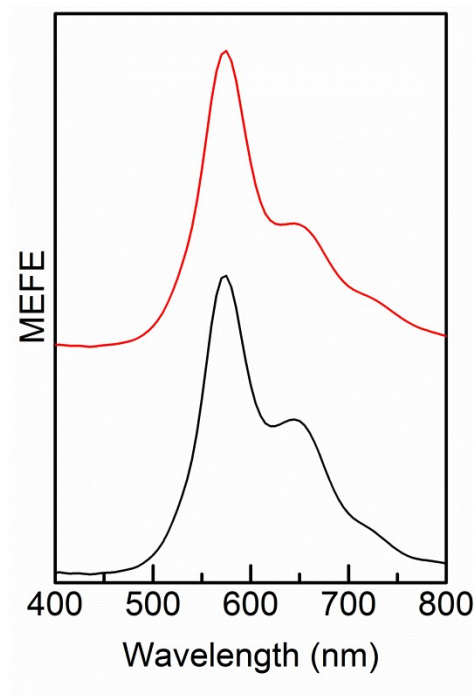

**Figure S3.** The spectra of RB70 with circumradius of 100 nm (black line) and circumradius of 105 nm (red line). Both the tip-mode and edge-mode resonances show a slight red-shift in the resonance wavelength as the circumradius increases.

### References:

1. Peng Yang, Herve' Portale's, and Marie-Paule Pilen; Identification of Multipolar Surface Plasmon Resonances in Triangular Silver Nanoprisms with Very High Aspect Ratios Using the DDA Method. *J. Phys. Chem. C* 2009, 113, 11597–11604
2. Maier, S. A., *Plasmonics: Fundamentals and Applications: Fundamentals and Applications*. Springer: 2007.
3. Jeffrey N. Anker, W. Paige Hall, Olga Lyandres, Nilam C. Shah, Jing Zhao and Richard P. Van Duyne; Biosensing with plasmonic nanosensors. *Nature materials*, vol. 7, JUNE 2008
4. Amanda J. Haes, Christy L. Haynes and Richard P. Van Duyne, Nanosphere Lithography: Self-Assembled Photonic and Magnetic Materials; *MRS Proceedings* , Volume 636, 2000
